# Supplementary material
Source: publisher figshare collection journal article supplement (https://geolsoc.figshare.com/ndownloader/files/36556799)
Supplement: Supplementary file 1 [file 36556799]

## Sheet: KS test results
a	Swansea		Hughes		Brithdir		Rhondda		Llynfi
All Pennant	D-stat	0.0263697	D-stat	0.0550548	D-stat	0.0351237	D-stat	0.0145749	D-stat	0.0239495
	D-crit	0.0798685	D-crit	0.0720368	D-crit	0.0783849	D-crit	0.0595775	D-crit	0.0973877
Swansea			D-stat	0.0814245	D-stat	0.0431148	D-stat	0.0255566	D-stat	0.0307771
			D-crit	0.098551	D-crit	0.103245	D-crit	0.0899256	D-crit	0.11822
Hughes					D-stat	0.0870927	D-stat	0.0558679	D-stat	0.0691051
					D-crit	0.0973595	D-crit	0.0830709	D-crit	0.113142
Brithdir							D-stat	0.0429274	D-stat	0.0555199
							D-crit	0.0886147	D-crit	0.117235
Rhondda									D-stat	0.037414
									D-crit	0.10575
b	Loc 5.3		Loc 6.2		Where D-stat > D-crit, distributions are considered to statisitically significantly different
Loc 5.2	D-stat	0.2	D-stat	0.1661
	D-crit	0.1651	D-crit	0.1565

## Sheet: All Pennant Tests
	Swansea								Hughes								Brithdir								Rhondda								Llynfi
Bin lower	All Pennant	Swansea		Cum%a	Cum%b	Diff		Bin lower	All Pennant	Hughes		Cum%a	Cum%b	Diff		Bin lower	All Pennant	Brithdir		Cum%a	Cum%b	Diff		Bin lower	All Pennant	Rhondda		Cum%a	Cum%b	Diff		Bin lower	All Pennant	Llynfi		Cum%a	Cum%b	Diff
4.78657e-05	2	1		0.000997009	0.00301205	0.00201504		4.78657e-05	2	0		0.000997009	0	0.000997009		4.78657e-05	2	1		0.000997009	0.00288184	0.00188484		4.78657e-05	2	0		0.000997009	0	0.000997009		4.78657e-05	2	0		0.000997009	0	0.000997009
0.000104752	7	0		0.00348953	0	0.00348953		0.000104752	7	2		0.00348953	0.00470588	0.00121635		0.000104752	7	3		0.00348953	0.00864553	0.005156		0.000104752	7	1		0.00348953	0.00144718	0.00204235		0.000104752	7	1		0.00348953	0.00473934	0.00124981
0.000161639	25	2		0.0124626	0.0060241	0.00643852		0.000161639	25	1		0.0124626	0.00235294	0.0101097		0.000161639	25	11		0.0124626	0.0317003	0.0192377		0.000161639	25	9		0.0124626	0.0130246	0.00056199		0.000161639	25	2		0.0124626	0.00947867	0.00298394
0.000218526	93	17		0.0463609	0.0512048	0.0048439		0.000218526	93	11		0.0463609	0.0258824	0.0204786		0.000218526	93	25		0.0463609	0.0720461	0.0256852		0.000218526	93	35		0.0463609	0.0506512	0.00429031		0.000218526	93	5		0.0463609	0.0236967	0.0226642
0.000275412	219	45		0.109172	0.135542	0.0263697		0.000275412	219	23		0.109172	0.0541176	0.0550548		0.000275412	219	49		0.109172	0.14121	0.0320379		0.000275412	219	76		0.109172	0.109986	0.000813046		0.000275412	219	26		0.109172	0.123223	0.0140503
0.000332299	277	49		0.138086	0.14759	0.00950462		0.000332299	277	52		0.138086	0.122353	0.0157328		0.000332299	277	49		0.138086	0.14121	0.00312463		0.000332299	277	100		0.138086	0.144718	0.00663206		0.000332299	277	27		0.138086	0.127962	0.0101237
0.000389186	293	47		0.146062	0.141566	0.00449555		0.000389186	293	67		0.146062	0.157647	0.0115852		0.000389186	293	42		0.146062	0.121037	0.0250244		0.000389186	293	111		0.146062	0.160637	0.0145749		0.000389186	293	26		0.146062	0.123223	0.0228391
0.000446072	310	48		0.154536	0.144578	0.00995808		0.000446072	310	68		0.154536	0.16	0.00546361		0.000446072	310	43		0.154536	0.123919	0.0306171		0.000446072	310	114		0.154536	0.164978	0.0104419		0.000446072	310	37		0.154536	0.175355	0.0208191
0.000502959	220	29		0.109671	0.0873494	0.0223216		0.000502959	220	60		0.109671	0.141176	0.0315055		0.000502959	220	30		0.109671	0.0864553	0.0232157		0.000502959	220	77		0.109671	0.111433	0.00176172		0.000502959	220	24		0.109671	0.113744	0.00407309
0.000559846	155	23		0.0772682	0.0692771	0.00799109		0.000559846	155	33		0.0772682	0.0776471	0.000378863		0.000559846	155	39		0.0772682	0.112392	0.0351237		0.000559846	155	48		0.0772682	0.0694645	0.00780365		0.000559846	155	12		0.0772682	0.056872	0.0203962
0.000616732	137	24		0.0682951	0.0722892	0.00399404		0.000616732	137	40		0.0682951	0.0941176	0.0258225		0.000616732	137	16		0.0682951	0.0461095	0.0221856		0.000616732	137	43		0.0682951	0.0622287	0.00606646		0.000616732	137	14		0.0682951	0.0663507	0.0019444
0.000673619	71	14		0.0353938	0.0421687	0.00677486		0.000673619	71	23		0.0353938	0.0541176	0.0187238		0.000673619	71	4		0.0353938	0.0115274	0.0238664		0.000673619	71	26		0.0353938	0.0376266	0.00223281		0.000673619	71	4		0.0353938	0.0189573	0.0164365
0.000730506	69	9		0.0343968	0.0271084	0.00728838		0.000730506	69	24		0.0343968	0.0564706	0.0220738		0.000730506	69	10		0.0343968	0.0288184	0.00557837		0.000730506	69	16		0.0343968	0.0231548	0.011242		0.000730506	69	10		0.0343968	0.0473934	0.0129966
0.000787392	43	7		0.0214357	0.0210843	0.000351356		0.000787392	43	9		0.0214357	0.0211765	0.000259222		0.000787392	43	13		0.0214357	0.037464	0.0160283		0.000787392	43	9		0.0214357	0.0130246	0.00841109		0.000787392	43	5		0.0214357	0.0236967	0.00226099
0.000844279	14	5		0.00697906	0.0150602	0.00808118		0.000844279	14	0		0.00697906	0	0.00697906		0.000844279	14	0		0.00697906	0	0.00697906		0.000844279	14	8		0.00697906	0.0115774	0.00459836		0.000844279	14	1		0.00697906	0.00473934	0.00223973
0.000901166	15	1		0.00747757	0.00301205	0.00446552		0.000901166	15	5		0.00747757	0.0117647	0.00428714		0.000901166	15	3		0.00747757	0.00864553	0.00116797		0.000901166	15	2		0.00747757	0.00289436	0.00458321		0.000901166	15	4		0.00747757	0.0189573	0.0114798
0.000958052	14	3		0.00697906	0.00903614	0.00205708		0.000958052	14	5		0.00697906	0.0117647	0.00478564		0.000958052	14	0		0.00697906	0	0.00697906		0.000958052	14	6		0.00697906	0.00868307	0.00170401		0.000958052	14	0		0.00697906	0	0.00697906
0.00101494	4	0		0.00199402	0	0.00199402		0.00101494	4	0		0.00199402	0	0.00199402		0.00101494	4	1		0.00199402	0.00288184	0.000887826		0.00101494	4	1		0.00199402	0.00144718	0.00054684		0.00101494	4	2		0.00199402	0.00947867	0.00748466
0.00107183	7	0		0.00348953	0	0.00348953		0.00107183	7	2		0.00348953	0.00470588	0.00121635		0.00107183	7	0		0.00348953	0	0.00348953		0.00107183	7	4		0.00348953	0.00578871	0.00229918		0.00107183	7	1		0.00348953	0.00473934	0.00124981
0.00112871	1	0		0.000498504	0	0.000498504		0.00112871	1	0		0.000498504	0	0.000498504		0.00112871	1	0		0.000498504	0	0.000498504		0.00112871	1	1		0.000498504	0.00144718	0.000948674		0.00112871	1	0		0.000498504	0	0.000498504
0.0011856	9	0		0.00448654	0	0.00448654		0.0011856	9	0		0.00448654	0	0.00448654		0.0011856	9	2		0.00448654	0.00576369	0.00127715		0.0011856	9	1		0.00448654	0.00144718	0.00303936		0.0011856	9	6		0.00448654	0.028436	0.0239495
0.00124249	5	5		0.00249252	0.0150602	0.0125677		0.00124249	5	0		0.00249252	0	0.00249252		0.00124249	5	0		0.00249252	0	0.00249252		0.00124249	5	0		0.00249252	0	0.00249252		0.00124249	5	0		0.00249252	0	0.00249252
0.00129937	2	0		0.000997009	0	0.000997009		0.00129937	2	0		0.000997009	0	0.000997009		0.00129937	2	1		0.000997009	0.00288184	0.00188484		0.00129937	2	1		0.000997009	0.00144718	0.000450169		0.00129937	2	0		0.000997009	0	0.000997009
0.00135626	1	0		0.000498504	0	0.000498504		0.00135626	1	0		0.000498504	0	0.000498504		0.00135626	1	0		0.000498504	0	0.000498504		0.00135626	1	1		0.000498504	0.00144718	0.000948674		0.00135626	1	0		0.000498504	0	0.000498504
0.00141315	8	2		0.00398804	0.0060241	0.00203606		0.00141315	8	0		0.00398804	0	0.00398804		0.00141315	8	2		0.00398804	0.00576369	0.00177565		0.00141315	8	0		0.00398804	0	0.00398804		0.00141315	8	4		0.00398804	0.0189573	0.0149693
0.00147003	0	0		0	0	0		0.00147003	0	0		0	0	0		0.00147003	0	0		0	0	0		0.00147003	0	0		0	0	0		0.00147003	0	0		0	0	0
0.00152692	0	0		0	0	0		0.00152692	0	0		0	0	0		0.00152692	0	0		0	0	0		0.00152692	0	0		0	0	0		0.00152692	0	0		0	0	0
0.00158381	0	0		0	0	0		0.00158381	0	0		0	0	0		0.00158381	0	0		0	0	0		0.00158381	0	0		0	0	0		0.00158381	0	0		0	0	0
0.00164069	1	1		0.000498504	0.00301205	0.00251354		0.00164069	1	0		0.000498504	0	0.000498504		0.00164069	1	0		0.000498504	0	0.000498504		0.00164069	1	0		0.000498504	0	0.000498504		0.00164069	1	0		0.000498504	0	0.000498504
0.00169758	3	0		0.00149551	0	0.00149551		0.00169758	3	0		0.00149551	0	0.00149551		0.00169758	3	3		0.00149551	0.00864553	0.00715002		0.00169758	3	0		0.00149551	0	0.00149551		0.00169758	3	0		0.00149551	0	0.00149551
0.00175447	0	0		0	0	0		0.00175447	0	0		0	0	0		0.00175447	0	0		0	0	0		0.00175447	0	0		0	0	0		0.00175447	0	0		0	0	0
0.00181135	0	0		0	0	0		0.00181135	0	0		0	0	0		0.00181135	0	0		0	0	0		0.00181135	0	0		0	0	0		0.00181135	0	0		0	0	0
0.00186824	0	0		0	0	0		0.00186824	0	0		0	0	0		0.00186824	0	0		0	0	0		0.00186824	0	0		0	0	0		0.00186824	0	0		0	0	0
0.00192513	0	0		0	0	0		0.00192513	0	0		0	0	0		0.00192513	0	0		0	0	0		0.00192513	0	0		0	0	0		0.00192513	0	0		0	0	0
0.00198201	0	0		0	0	0		0.00198201	0	0		0	0	0		0.00198201	0	0		0	0	0		0.00198201	0	0		0	0	0		0.00198201	0	0		0	0	0
0.0020389	0	0		0	0	0		0.0020389	0	0		0	0	0		0.0020389	0	0		0	0	0		0.0020389	0	0		0	0	0		0.0020389	0	0		0	0	0
0.00209579	0	0		0	0	0		0.00209579	0	0		0	0	0		0.00209579	0	0		0	0	0		0.00209579	0	0		0	0	0		0.00209579	0	0		0	0	0
0.00215267	0	0		0	0	0		0.00215267	0	0		0	0	0		0.00215267	0	0		0	0	0		0.00215267	0	0		0	0	0		0.00215267	0	0		0	0	0
0.00220956	0	0		0	0	0		0.00220956	0	0		0	0	0		0.00220956	0	0		0	0	0		0.00220956	0	0		0	0	0		0.00220956	0	0		0	0	0
0.00226645	0	0		0	0	0		0.00226645	0	0		0	0	0		0.00226645	0	0		0	0	0		0.00226645	0	0		0	0	0		0.00226645	0	0		0	0	0
0.00232333	0	0		0	0	0		0.00232333	0	0		0	0	0		0.00232333	0	0		0	0	0		0.00232333	0	0		0	0	0		0.00232333	0	0		0	0	0
0.00238022	0	0		0	0	0		0.00238022	0	0		0	0	0		0.00238022	0	0		0	0	0		0.00238022	0	0		0	0	0		0.00238022	0	0		0	0	0
0.00243711	0	0		0	0	0		0.00243711	0	0		0	0	0		0.00243711	0	0		0	0	0		0.00243711	0	0		0	0	0		0.00243711	0	0		0	0	0
0.00249399	0	0		0	0	0		0.00249399	0	0		0	0	0		0.00249399	0	0		0	0	0		0.00249399	0	0		0	0	0		0.00249399	0	0		0	0	0
0.00255088	0	0		0	0	0		0.00255088	0	0		0	0	0		0.00255088	0	0		0	0	0		0.00255088	0	0		0	0	0		0.00255088	0	0		0	0	0
0.00260777	0	0		0	0	0		0.00260777	0	0		0	0	0		0.00260777	0	0		0	0	0		0.00260777	0	0		0	0	0		0.00260777	0	0		0	0	0
0.00266465	0	0		0	0	0		0.00266465	0	0		0	0	0		0.00266465	0	0		0	0	0		0.00266465	0	0		0	0	0		0.00266465	0	0		0	0	0
0.00272154	0	0		0	0	0		0.00272154	0	0		0	0	0		0.00272154	0	0		0	0	0		0.00272154	0	0		0	0	0		0.00272154	0	0		0	0	0
0.00277843	0	0		0	0	0		0.00277843	0	0		0	0	0		0.00277843	0	0		0	0	0		0.00277843	0	0		0	0	0		0.00277843	0	0		0	0	0
0.00283531	1	0		0.000498504	0	0.000498504		0.00283531	1	0		0.000498504	0	0.000498504		0.00283531	1	0		0.000498504	0	0.000498504		0.00283531	1	1		0.000498504	0.00144718	0.000948674		0.00283531	1	0		0.000498504	0	0.000498504
Total:	2006	332						Total:	2006	425						Total:	2006	347						Total:	2006	691						Total:	2006	211
					D-stat	0.0263697							D-stat	0.0550548							D-stat	0.0351237							D-stat	0.0145749							D-stat	0.0239495
					D-crit	0.0798685							D-crit	0.0720368							D-crit	0.0783849							D-crit	0.0595775							D-crit	0.0973877
					Sig diff?	no							Sig diff?	no							Sig diff?	no							Sig diff?	no							Sig diff?	no

## Sheet: Swansea
	Swansea								Hughes								Brithdir								Rhondda								Llynfi
Bin lower	Swansea	Swansea		Cum%a	Cum%b	Diff		Bin lower	Swansea	Hughes		Cum%a	Cum%b	Diff		Bin lower	Swansea	Brithdir		Cum%a	Cum%b	Diff		Bin lower	Swansea	Rhondda		Cum%a	Cum%b	Diff		Bin lower	Swansea	Llynfi		Cum%a	Cum%b	Diff
4.78657e-05	1	1		0.00301205	0.00301205	0		4.78657e-05	1	0		0.00301205	0	0.00301205		4.78657e-05	1	1		0.00301205	0.00288184	0.000130204		4.78657e-05	1	0		0.00301205	0	0.00301205		4.78657e-05	1	0		0.00301205	0	0.00301205
0.000104752	0	0		0	0	0		0.000104752	0	2		0	0.00470588	0.00470588		0.000104752	0	3		0	0.00864553	0.00864553		0.000104752	0	1		0	0.00144718	0.00144718		0.000104752	0	1		0	0.00473934	0.00473934
0.000161639	2	2		0.0060241	0.0060241	0		0.000161639	2	1		0.0060241	0.00235294	0.00367116		0.000161639	2	11		0.0060241	0.0317003	0.0256762		0.000161639	2	9		0.0060241	0.0130246	0.00700051		0.000161639	2	2		0.0060241	0.00947867	0.00345458
0.000218526	17	17		0.0512048	0.0512048	0		0.000218526	17	11		0.0512048	0.0258824	0.0253225		0.000218526	17	25		0.0512048	0.0720461	0.0208413		0.000218526	17	35		0.0512048	0.0506512	0.000553589		0.000218526	17	5		0.0512048	0.0236967	0.0275081
0.000275412	45	45		0.135542	0.135542	0		0.000275412	45	23		0.135542	0.0541176	0.0814245		0.000275412	45	49		0.135542	0.14121	0.00566821		0.000275412	45	76		0.135542	0.109986	0.0255566		0.000275412	45	26		0.135542	0.123223	0.0123194
0.000332299	49	49		0.14759	0.14759	0		0.000332299	49	52		0.14759	0.122353	0.0252374		0.000332299	49	49		0.14759	0.14121	0.00637999		0.000332299	49	100		0.14759	0.144718	0.00287256		0.000332299	49	27		0.14759	0.127962	0.0196283
0.000389186	47	47		0.141566	0.141566	0		0.000389186	47	67		0.141566	0.157647	0.0160808		0.000389186	47	42		0.141566	0.121037	0.0205288		0.000389186	47	111		0.141566	0.160637	0.0190705		0.000389186	47	26		0.141566	0.123223	0.0183435
0.000446072	48	48		0.144578	0.144578	0		0.000446072	48	68		0.144578	0.16	0.0154217		0.000446072	48	43		0.144578	0.123919	0.020659		0.000446072	48	114		0.144578	0.164978	0.0204		0.000446072	48	37		0.144578	0.175355	0.0307771
0.000502959	29	29		0.0873494	0.0873494	0		0.000502959	29	60		0.0873494	0.141176	0.0538271		0.000502959	29	30		0.0873494	0.0864553	0.000894066		0.000502959	29	77		0.0873494	0.111433	0.0240833		0.000502959	29	24		0.0873494	0.113744	0.0263947
0.000559846	23	23		0.0692771	0.0692771	0		0.000559846	23	33		0.0692771	0.0776471	0.00836995		0.000559846	23	39		0.0692771	0.112392	0.0431148		0.000559846	23	48		0.0692771	0.0694645	0.000187436		0.000559846	23	12		0.0692771	0.056872	0.0124051
0.000616732	24	24		0.0722892	0.0722892	0		0.000616732	24	40		0.0722892	0.0941176	0.0218285		0.000616732	24	16		0.0722892	0.0461095	0.0261796		0.000616732	24	43		0.0722892	0.0622287	0.0100605		0.000616732	24	14		0.0722892	0.0663507	0.00593845
0.000673619	14	14		0.0421687	0.0421687	0		0.000673619	14	23		0.0421687	0.0541176	0.011949		0.000673619	14	4		0.0421687	0.0115274	0.0306413		0.000673619	14	26		0.0421687	0.0376266	0.00454205		0.000673619	14	4		0.0421687	0.0189573	0.0232113
0.000730506	9	9		0.0271084	0.0271084	0		0.000730506	9	24		0.0271084	0.0564706	0.0293622		0.000730506	9	10		0.0271084	0.0288184	0.00171001		0.000730506	9	16		0.0271084	0.0231548	0.00395359		0.000730506	9	10		0.0271084	0.0473934	0.0202849
0.000787392	7	7		0.0210843	0.0210843	0		0.000787392	7	9		0.0210843	0.0211765	9.21332e-05		0.000787392	7	13		0.0210843	0.037464	0.0163796		0.000787392	7	9		0.0210843	0.0130246	0.00805974		0.000787392	7	5		0.0210843	0.0236967	0.00261235
0.000844279	5	5		0.0150602	0.0150602	0		0.000844279	5	0		0.0150602	0	0.0150602		0.000844279	5	0		0.0150602	0	0.0150602		0.000844279	5	8		0.0150602	0.0115774	0.00348282		0.000844279	5	1		0.0150602	0.00473934	0.0103209
0.000901166	1	1		0.00301205	0.00301205	0		0.000901166	1	5		0.00301205	0.0117647	0.00875266		0.000901166	1	3		0.00301205	0.00864553	0.00563348		0.000901166	1	2		0.00301205	0.00289436	0.000117692		0.000901166	1	4		0.00301205	0.0189573	0.0159453
0.000958052	3	3		0.00903614	0.00903614	0		0.000958052	3	5		0.00903614	0.0117647	0.00272856		0.000958052	3	0		0.00903614	0	0.00903614		0.000958052	3	6		0.00903614	0.00868307	0.000353077		0.000958052	3	0		0.00903614	0	0.00903614
0.00101494	0	0		0	0	0		0.00101494	0	0		0	0	0		0.00101494	0	1		0	0.00288184	0.00288184		0.00101494	0	1		0	0.00144718	0.00144718		0.00101494	0	2		0	0.00947867	0.00947867
0.00107183	0	0		0	0	0		0.00107183	0	2		0	0.00470588	0.00470588		0.00107183	0	0		0	0	0		0.00107183	0	4		0	0.00578871	0.00578871		0.00107183	0	1		0	0.00473934	0.00473934
0.00112871	0	0		0	0	0		0.00112871	0	0		0	0	0		0.00112871	0	0		0	0	0		0.00112871	0	1		0	0.00144718	0.00144718		0.00112871	0	0		0	0	0
0.0011856	0	0		0	0	0		0.0011856	0	0		0	0	0		0.0011856	0	2		0	0.00576369	0.00576369		0.0011856	0	1		0	0.00144718	0.00144718		0.0011856	0	6		0	0.028436	0.028436
0.00124249	5	5		0.0150602	0.0150602	0		0.00124249	5	0		0.0150602	0	0.0150602		0.00124249	5	0		0.0150602	0	0.0150602		0.00124249	5	0		0.0150602	0	0.0150602		0.00124249	5	0		0.0150602	0	0.0150602
0.00129937	0	0		0	0	0		0.00129937	0	0		0	0	0		0.00129937	0	1		0	0.00288184	0.00288184		0.00129937	0	1		0	0.00144718	0.00144718		0.00129937	0	0		0	0	0
0.00135626	0	0		0	0	0		0.00135626	0	0		0	0	0		0.00135626	0	0		0	0	0		0.00135626	0	1		0	0.00144718	0.00144718		0.00135626	0	0		0	0	0
0.00141315	2	2		0.0060241	0.0060241	0		0.00141315	2	0		0.0060241	0	0.0060241		0.00141315	2	2		0.0060241	0.00576369	0.000260408		0.00141315	2	0		0.0060241	0	0.0060241		0.00141315	2	4		0.0060241	0.0189573	0.0129332
0.00147003	0	0		0	0	0		0.00147003	0	0		0	0	0		0.00147003	0	0		0	0	0		0.00147003	0	0		0	0	0		0.00147003	0	0		0	0	0
0.00152692	0	0		0	0	0		0.00152692	0	0		0	0	0		0.00152692	0	0		0	0	0		0.00152692	0	0		0	0	0		0.00152692	0	0		0	0	0
0.00158381	0	0		0	0	0		0.00158381	0	0		0	0	0		0.00158381	0	0		0	0	0		0.00158381	0	0		0	0	0		0.00158381	0	0		0	0	0
0.00164069	1	1		0.00301205	0.00301205	0		0.00164069	1	0		0.00301205	0	0.00301205		0.00164069	1	0		0.00301205	0	0.00301205		0.00164069	1	0		0.00301205	0	0.00301205		0.00164069	1	0		0.00301205	0	0.00301205
0.00169758	0	0		0	0	0		0.00169758	0	0		0	0	0		0.00169758	0	3		0	0.00864553	0.00864553		0.00169758	0	0		0	0	0		0.00169758	0	0		0	0	0
0.00175447	0	0		0	0	0		0.00175447	0	0		0	0	0		0.00175447	0	0		0	0	0		0.00175447	0	0		0	0	0		0.00175447	0	0		0	0	0
0.00181135	0	0		0	0	0		0.00181135	0	0		0	0	0		0.00181135	0	0		0	0	0		0.00181135	0	0		0	0	0		0.00181135	0	0		0	0	0
0.00186824	0	0		0	0	0		0.00186824	0	0		0	0	0		0.00186824	0	0		0	0	0		0.00186824	0	0		0	0	0		0.00186824	0	0		0	0	0
0.00192513	0	0		0	0	0		0.00192513	0	0		0	0	0		0.00192513	0	0		0	0	0		0.00192513	0	0		0	0	0		0.00192513	0	0		0	0	0
0.00198201	0	0		0	0	0		0.00198201	0	0		0	0	0		0.00198201	0	0		0	0	0		0.00198201	0	0		0	0	0		0.00198201	0	0		0	0	0
0.0020389	0	0		0	0	0		0.0020389	0	0		0	0	0		0.0020389	0	0		0	0	0		0.0020389	0	0		0	0	0		0.0020389	0	0		0	0	0
0.00209579	0	0		0	0	0		0.00209579	0	0		0	0	0		0.00209579	0	0		0	0	0		0.00209579	0	0		0	0	0		0.00209579	0	0		0	0	0
0.00215267	0	0		0	0	0		0.00215267	0	0		0	0	0		0.00215267	0	0		0	0	0		0.00215267	0	0		0	0	0		0.00215267	0	0		0	0	0
0.00220956	0	0		0	0	0		0.00220956	0	0		0	0	0		0.00220956	0	0		0	0	0		0.00220956	0	0		0	0	0		0.00220956	0	0		0	0	0
0.00226645	0	0		0	0	0		0.00226645	0	0		0	0	0		0.00226645	0	0		0	0	0		0.00226645	0	0		0	0	0		0.00226645	0	0		0	0	0
0.00232333	0	0		0	0	0		0.00232333	0	0		0	0	0		0.00232333	0	0		0	0	0		0.00232333	0	0		0	0	0		0.00232333	0	0		0	0	0
0.00238022	0	0		0	0	0		0.00238022	0	0		0	0	0		0.00238022	0	0		0	0	0		0.00238022	0	0		0	0	0		0.00238022	0	0		0	0	0
0.00243711	0	0		0	0	0		0.00243711	0	0		0	0	0		0.00243711	0	0		0	0	0		0.00243711	0	0		0	0	0		0.00243711	0	0		0	0	0
0.00249399	0	0		0	0	0		0.00249399	0	0		0	0	0		0.00249399	0	0		0	0	0		0.00249399	0	0		0	0	0		0.00249399	0	0		0	0	0
0.00255088	0	0		0	0	0		0.00255088	0	0		0	0	0		0.00255088	0	0		0	0	0		0.00255088	0	0		0	0	0		0.00255088	0	0		0	0	0
0.00260777	0	0		0	0	0		0.00260777	0	0		0	0	0		0.00260777	0	0		0	0	0		0.00260777	0	0		0	0	0		0.00260777	0	0		0	0	0
0.00266465	0	0		0	0	0		0.00266465	0	0		0	0	0		0.00266465	0	0		0	0	0		0.00266465	0	0		0	0	0		0.00266465	0	0		0	0	0
0.00272154	0	0		0	0	0		0.00272154	0	0		0	0	0		0.00272154	0	0		0	0	0		0.00272154	0	0		0	0	0		0.00272154	0	0		0	0	0
0.00277843	0	0		0	0	0		0.00277843	0	0		0	0	0		0.00277843	0	0		0	0	0		0.00277843	0	0		0	0	0		0.00277843	0	0		0	0	0
0.00283531	0	0		0	0	0		0.00283531	0	0		0	0	0		0.00283531	0	0		0	0	0		0.00283531	0	1		0	0.00144718	0.00144718		0.00283531	0	0		0	0	0
Total:	332	332						Total:	332	425						Total:	332	347						Total:	332	691						Total:	332	211
					D-stat	0							D-stat	0.0814245							D-stat	0.0431148							D-stat	0.0255566							D-stat	0.0307771
					D-crit	0.104368							D-crit	0.098551							D-crit	0.103245							D-crit	0.0899256							D-crit	0.11822
					Sig diff?	no							Sig diff?	no							Sig diff?	no							Sig diff?	no							Sig diff?	no

## Sheet: Hughes
	Swansea								Hughes								Brithdir								Rhondda								Llynfi
Bin lower	Hughes	Swansea		Cum%a	Cum%b	Diff		Bin lower	Hughes	Hughes		Cum%a	Cum%b	Diff		Bin lower	Hughes	Brithdir		Cum%a	Cum%b	Diff		Bin lower	Hughes	Rhondda		Cum%a	Cum%b	Diff		Bin lower	Hughes	Llynfi		Cum%a	Cum%b	Diff
4.78657e-05	0	1		0	0.00301205	0.00301205		4.78657e-05	0	0		0	0	0		4.78657e-05	0	1		0	0.00288184	0.00288184		4.78657e-05	0	0		0	0	0		4.78657e-05	0	0		0	0	0
0.000104752	2	0		0.00470588	0	0.00470588		0.000104752	2	2		0.00470588	0.00470588	0		0.000104752	2	3		0.00470588	0.00864553	0.00393965		0.000104752	2	1		0.00470588	0.00144718	0.0032587		0.000104752	2	1		0.00470588	0.00473934	3.34541e-05
0.000161639	1	2		0.00235294	0.0060241	0.00367116		0.000161639	1	1		0.00235294	0.00235294	0		0.000161639	1	11		0.00235294	0.0317003	0.0293473		0.000161639	1	9		0.00235294	0.0130246	0.0106717		0.000161639	1	2		0.00235294	0.00947867	0.00712573
0.000218526	11	17		0.0258824	0.0512048	0.0253225		0.000218526	11	11		0.0258824	0.0258824	0		0.000218526	11	25		0.0258824	0.0720461	0.0461638		0.000218526	11	35		0.0258824	0.0506512	0.0247689		0.000218526	11	5		0.0258824	0.0236967	0.00218567
0.000275412	23	45		0.0541176	0.135542	0.0814245		0.000275412	23	23		0.0541176	0.0541176	0		0.000275412	23	49		0.0541176	0.14121	0.0870927		0.000275412	23	76		0.0541176	0.109986	0.0558679		0.000275412	23	26		0.0541176	0.123223	0.0691051
0.000332299	52	49		0.122353	0.14759	0.0252374		0.000332299	52	52		0.122353	0.122353	0		0.000332299	52	49		0.122353	0.14121	0.0188574		0.000332299	52	100		0.122353	0.144718	0.0223649		0.000332299	52	27		0.122353	0.127962	0.00560914
0.000389186	67	47		0.157647	0.141566	0.0160808		0.000389186	67	67		0.157647	0.157647	0		0.000389186	67	42		0.157647	0.121037	0.0366096		0.000389186	67	111		0.157647	0.160637	0.0029897		0.000389186	67	26		0.157647	0.123223	0.0344243
0.000446072	68	48		0.16	0.144578	0.0154217		0.000446072	68	68		0.16	0.16	0		0.000446072	68	43		0.16	0.123919	0.0360807		0.000446072	68	114		0.16	0.164978	0.00497829		0.000446072	68	37		0.16	0.175355	0.0153555
0.000502959	60	29		0.141176	0.0873494	0.0538271		0.000502959	60	60		0.141176	0.141176	0		0.000502959	60	30		0.141176	0.0864553	0.0547211		0.000502959	60	77		0.141176	0.111433	0.0297438		0.000502959	60	24		0.141176	0.113744	0.0274324
0.000559846	33	23		0.0776471	0.0692771	0.00836995		0.000559846	33	33		0.0776471	0.0776471	0		0.000559846	33	39		0.0776471	0.112392	0.0347449		0.000559846	33	48		0.0776471	0.0694645	0.00818251		0.000559846	33	12		0.0776471	0.056872	0.020775
0.000616732	40	24		0.0941176	0.0722892	0.0218285		0.000616732	40	40		0.0941176	0.0941176	0		0.000616732	40	16		0.0941176	0.0461095	0.0480081		0.000616732	40	43		0.0941176	0.0622287	0.031889		0.000616732	40	14		0.0941176	0.0663507	0.0277669
0.000673619	23	14		0.0541176	0.0421687	0.011949		0.000673619	23	23		0.0541176	0.0541176	0		0.000673619	23	4		0.0541176	0.0115274	0.0425903		0.000673619	23	26		0.0541176	0.0376266	0.016491		0.000673619	23	4		0.0541176	0.0189573	0.0351603
0.000730506	24	9		0.0564706	0.0271084	0.0293622		0.000730506	24	24		0.0564706	0.0564706	0		0.000730506	24	10		0.0564706	0.0288184	0.0276521		0.000730506	24	16		0.0564706	0.0231548	0.0333157		0.000730506	24	10		0.0564706	0.0473934	0.00907722
0.000787392	9	7		0.0211765	0.0210843	9.21332e-05		0.000787392	9	9		0.0211765	0.0211765	0		0.000787392	9	13		0.0211765	0.037464	0.0162875		0.000787392	9	9		0.0211765	0.0130246	0.00815187		0.000787392	9	5		0.0211765	0.0236967	0.00252021
0.000844279	0	5		0	0.0150602	0.0150602		0.000844279	0	0		0	0	0		0.000844279	0	0		0	0	0		0.000844279	0	8		0	0.0115774	0.0115774		0.000844279	0	1		0	0.00473934	0.00473934
0.000901166	5	1		0.0117647	0.00301205	0.00875266		0.000901166	5	5		0.0117647	0.0117647	0		0.000901166	5	3		0.0117647	0.00864553	0.00311917		0.000901166	5	2		0.0117647	0.00289436	0.00887035		0.000901166	5	4		0.0117647	0.0189573	0.00719264
0.000958052	5	3		0.0117647	0.00903614	0.00272856		0.000958052	5	5		0.0117647	0.0117647	0		0.000958052	5	0		0.0117647	0	0.0117647		0.000958052	5	6		0.0117647	0.00868307	0.00308164		0.000958052	5	0		0.0117647	0	0.0117647
0.00101494	0	0		0	0	0		0.00101494	0	0		0	0	0		0.00101494	0	1		0	0.00288184	0.00288184		0.00101494	0	1		0	0.00144718	0.00144718		0.00101494	0	2		0	0.00947867	0.00947867
0.00107183	2	0		0.00470588	0	0.00470588		0.00107183	2	2		0.00470588	0.00470588	0		0.00107183	2	0		0.00470588	0	0.00470588		0.00107183	2	4		0.00470588	0.00578871	0.00108283		0.00107183	2	1		0.00470588	0.00473934	3.34541e-05
0.00112871	0	0		0	0	0		0.00112871	0	0		0	0	0		0.00112871	0	0		0	0	0		0.00112871	0	1		0	0.00144718	0.00144718		0.00112871	0	0		0	0	0
0.0011856	0	0		0	0	0		0.0011856	0	0		0	0	0		0.0011856	0	2		0	0.00576369	0.00576369		0.0011856	0	1		0	0.00144718	0.00144718		0.0011856	0	6		0	0.028436	0.028436
0.00124249	0	5		0	0.0150602	0.0150602		0.00124249	0	0		0	0	0		0.00124249	0	0		0	0	0		0.00124249	0	0		0	0	0		0.00124249	0	0		0	0	0
0.00129937	0	0		0	0	0		0.00129937	0	0		0	0	0		0.00129937	0	1		0	0.00288184	0.00288184		0.00129937	0	1		0	0.00144718	0.00144718		0.00129937	0	0		0	0	0
0.00135626	0	0		0	0	0		0.00135626	0	0		0	0	0		0.00135626	0	0		0	0	0		0.00135626	0	1		0	0.00144718	0.00144718		0.00135626	0	0		0	0	0
0.00141315	0	2		0	0.0060241	0.0060241		0.00141315	0	0		0	0	0		0.00141315	0	2		0	0.00576369	0.00576369		0.00141315	0	0		0	0	0		0.00141315	0	4		0	0.0189573	0.0189573
0.00147003	0	0		0	0	0		0.00147003	0	0		0	0	0		0.00147003	0	0		0	0	0		0.00147003	0	0		0	0	0		0.00147003	0	0		0	0	0
0.00152692	0	0		0	0	0		0.00152692	0	0		0	0	0		0.00152692	0	0		0	0	0		0.00152692	0	0		0	0	0		0.00152692	0	0		0	0	0
0.00158381	0	0		0	0	0		0.00158381	0	0		0	0	0		0.00158381	0	0		0	0	0		0.00158381	0	0		0	0	0		0.00158381	0	0		0	0	0
0.00164069	0	1		0	0.00301205	0.00301205		0.00164069	0	0		0	0	0		0.00164069	0	0		0	0	0		0.00164069	0	0		0	0	0		0.00164069	0	0		0	0	0
0.00169758	0	0		0	0	0		0.00169758	0	0		0	0	0		0.00169758	0	3		0	0.00864553	0.00864553		0.00169758	0	0		0	0	0		0.00169758	0	0		0	0	0
0.00175447	0	0		0	0	0		0.00175447	0	0		0	0	0		0.00175447	0	0		0	0	0		0.00175447	0	0		0	0	0		0.00175447	0	0		0	0	0
0.00181135	0	0		0	0	0		0.00181135	0	0		0	0	0		0.00181135	0	0		0	0	0		0.00181135	0	0		0	0	0		0.00181135	0	0		0	0	0
0.00186824	0	0		0	0	0		0.00186824	0	0		0	0	0		0.00186824	0	0		0	0	0		0.00186824	0	0		0	0	0		0.00186824	0	0		0	0	0
0.00192513	0	0		0	0	0		0.00192513	0	0		0	0	0		0.00192513	0	0		0	0	0		0.00192513	0	0		0	0	0		0.00192513	0	0		0	0	0
0.00198201	0	0		0	0	0		0.00198201	0	0		0	0	0		0.00198201	0	0		0	0	0		0.00198201	0	0		0	0	0		0.00198201	0	0		0	0	0
0.0020389	0	0		0	0	0		0.0020389	0	0		0	0	0		0.0020389	0	0		0	0	0		0.0020389	0	0		0	0	0		0.0020389	0	0		0	0	0
0.00209579	0	0		0	0	0		0.00209579	0	0		0	0	0		0.00209579	0	0		0	0	0		0.00209579	0	0		0	0	0		0.00209579	0	0		0	0	0
0.00215267	0	0		0	0	0		0.00215267	0	0		0	0	0		0.00215267	0	0		0	0	0		0.00215267	0	0		0	0	0		0.00215267	0	0		0	0	0
0.00220956	0	0		0	0	0		0.00220956	0	0		0	0	0		0.00220956	0	0		0	0	0		0.00220956	0	0		0	0	0		0.00220956	0	0		0	0	0
0.00226645	0	0		0	0	0		0.00226645	0	0		0	0	0		0.00226645	0	0		0	0	0		0.00226645	0	0		0	0	0		0.00226645	0	0		0	0	0
0.00232333	0	0		0	0	0		0.00232333	0	0		0	0	0		0.00232333	0	0		0	0	0		0.00232333	0	0		0	0	0		0.00232333	0	0		0	0	0
0.00238022	0	0		0	0	0		0.00238022	0	0		0	0	0		0.00238022	0	0		0	0	0		0.00238022	0	0		0	0	0		0.00238022	0	0		0	0	0
0.00243711	0	0		0	0	0		0.00243711	0	0		0	0	0		0.00243711	0	0		0	0	0		0.00243711	0	0		0	0	0		0.00243711	0	0		0	0	0
0.00249399	0	0		0	0	0		0.00249399	0	0		0	0	0		0.00249399	0	0		0	0	0		0.00249399	0	0		0	0	0		0.00249399	0	0		0	0	0
0.00255088	0	0		0	0	0		0.00255088	0	0		0	0	0		0.00255088	0	0		0	0	0		0.00255088	0	0		0	0	0		0.00255088	0	0		0	0	0
0.00260777	0	0		0	0	0		0.00260777	0	0		0	0	0		0.00260777	0	0		0	0	0		0.00260777	0	0		0	0	0		0.00260777	0	0		0	0	0
0.00266465	0	0		0	0	0		0.00266465	0	0		0	0	0		0.00266465	0	0		0	0	0		0.00266465	0	0		0	0	0		0.00266465	0	0		0	0	0
0.00272154	0	0		0	0	0		0.00272154	0	0		0	0	0		0.00272154	0	0		0	0	0		0.00272154	0	0		0	0	0		0.00272154	0	0		0	0	0
0.00277843	0	0		0	0	0		0.00277843	0	0		0	0	0		0.00277843	0	0		0	0	0		0.00277843	0	0		0	0	0		0.00277843	0	0		0	0	0
0.00283531	0	0		0	0	0		0.00283531	0	0		0	0	0		0.00283531	0	0		0	0	0		0.00283531	0	1		0	0.00144718	0.00144718		0.00283531	0	0		0	0	0
Total:	425	332						Total:	425	425						Total:	425	347						Total:	425	691						Total:	425	211
					D-stat	0.0814245							D-stat	0							D-stat	0.0870927							D-stat	0.0558679							D-stat	0.0691051
					D-crit	0.098551							D-crit	0.0923567							D-crit	0.0973595							D-crit	0.0830709							D-crit	0.113142
					Sig diff?	no							Sig diff?	no							Sig diff?	no							Sig diff?	no							Sig diff?	no

## Sheet: Brithdir
	Swansea								Hughes								Brithdir								Rhondda								Llynfi
Bin lower	Brithdir	Swansea		Cum%a	Cum%b	Diff		Bin lower	Brithdir	Hughes		Cum%a	Cum%b	Diff		Bin lower	Brithdir	Brithdir		Cum%a	Cum%b	Diff		Bin lower	Brithdir	Rhondda		Cum%a	Cum%b	Diff		Bin lower	Brithdir	Llynfi		Cum%a	Cum%b	Diff
4.78657e-05	1	1		0.00288184	0.00301205	0.000130204		4.78657e-05	1	0		0.00288184	0	0.00288184		4.78657e-05	1	1		0.00288184	0.00288184	0		4.78657e-05	1	0		0.00288184	0	0.00288184		4.78657e-05	1	0		0.00288184	0	0.00288184
0.000104752	3	0		0.00864553	0	0.00864553		0.000104752	3	2		0.00864553	0.00470588	0.00393965		0.000104752	3	3		0.00864553	0.00864553	0		0.000104752	3	1		0.00864553	0.00144718	0.00719836		0.000104752	3	1		0.00864553	0.00473934	0.0039062
0.000161639	11	2		0.0317003	0.0060241	0.0256762		0.000161639	11	1		0.0317003	0.00235294	0.0293473		0.000161639	11	11		0.0317003	0.0317003	0		0.000161639	11	9		0.0317003	0.0130246	0.0186757		0.000161639	11	2		0.0317003	0.00947867	0.0222216
0.000218526	25	17		0.0720461	0.0512048	0.0208413		0.000218526	25	11		0.0720461	0.0258824	0.0461638		0.000218526	25	25		0.0720461	0.0720461	0		0.000218526	25	35		0.0720461	0.0506512	0.0213949		0.000218526	25	5		0.0720461	0.0236967	0.0483494
0.000275412	49	45		0.14121	0.135542	0.00566821		0.000275412	49	23		0.14121	0.0541176	0.0870927		0.000275412	49	49		0.14121	0.14121	0		0.000275412	49	76		0.14121	0.109986	0.0312248		0.000275412	49	26		0.14121	0.123223	0.0179876
0.000332299	49	49		0.14121	0.14759	0.00637999		0.000332299	49	52		0.14121	0.122353	0.0188574		0.000332299	49	49		0.14121	0.14121	0		0.000332299	49	100		0.14121	0.144718	0.00350743		0.000332299	49	27		0.14121	0.127962	0.0132483
0.000389186	42	47		0.121037	0.141566	0.0205288		0.000389186	42	67		0.121037	0.157647	0.0366096		0.000389186	42	42		0.121037	0.121037	0		0.000389186	42	111		0.121037	0.160637	0.0395993		0.000389186	42	26		0.121037	0.123223	0.00218528
0.000446072	43	48		0.123919	0.144578	0.020659		0.000446072	43	68		0.123919	0.16	0.0360807		0.000446072	43	43		0.123919	0.123919	0		0.000446072	43	114		0.123919	0.164978	0.041059		0.000446072	43	37		0.123919	0.175355	0.0514361
0.000502959	30	29		0.0864553	0.0873494	0.000894066		0.000502959	30	60		0.0864553	0.141176	0.0547211		0.000502959	30	30		0.0864553	0.0864553	0		0.000502959	30	77		0.0864553	0.111433	0.0249774		0.000502959	30	24		0.0864553	0.113744	0.0272887
0.000559846	39	23		0.112392	0.0692771	0.0431148		0.000559846	39	33		0.112392	0.0776471	0.0347449		0.000559846	39	39		0.112392	0.112392	0		0.000559846	39	48		0.112392	0.0694645	0.0429274		0.000559846	39	12		0.112392	0.056872	0.0555199
0.000616732	16	24		0.0461095	0.0722892	0.0261796		0.000616732	16	40		0.0461095	0.0941176	0.0480081		0.000616732	16	16		0.0461095	0.0461095	0		0.000616732	16	43		0.0461095	0.0622287	0.0161191		0.000616732	16	14		0.0461095	0.0663507	0.0202412
0.000673619	4	14		0.0115274	0.0421687	0.0306413		0.000673619	4	23		0.0115274	0.0541176	0.0425903		0.000673619	4	4		0.0115274	0.0115274	0		0.000673619	4	26		0.0115274	0.0376266	0.0260993		0.000673619	4	4		0.0115274	0.0189573	0.00742997
0.000730506	10	9		0.0288184	0.0271084	0.00171001		0.000730506	10	24		0.0288184	0.0564706	0.0276521		0.000730506	10	10		0.0288184	0.0288184	0		0.000730506	10	16		0.0288184	0.0231548	0.0056636		0.000730506	10	10		0.0288184	0.0473934	0.0185749
0.000787392	13	7		0.037464	0.0210843	0.0163796		0.000787392	13	9		0.037464	0.0211765	0.0162875		0.000787392	13	13		0.037464	0.037464	0		0.000787392	13	9		0.037464	0.0130246	0.0244394		0.000787392	13	5		0.037464	0.0236967	0.0137673
0.000844279	0	5		0	0.0150602	0.0150602		0.000844279	0	0		0	0	0		0.000844279	0	0		0	0	0		0.000844279	0	8		0	0.0115774	0.0115774		0.000844279	0	1		0	0.00473934	0.00473934
0.000901166	3	1		0.00864553	0.00301205	0.00563348		0.000901166	3	5		0.00864553	0.0117647	0.00311917		0.000901166	3	3		0.00864553	0.00864553	0		0.000901166	3	2		0.00864553	0.00289436	0.00575118		0.000901166	3	4		0.00864553	0.0189573	0.0103118
0.000958052	0	3		0	0.00903614	0.00903614		0.000958052	0	5		0	0.0117647	0.0117647		0.000958052	0	0		0	0	0		0.000958052	0	6		0	0.00868307	0.00868307		0.000958052	0	0		0	0	0
0.00101494	1	0		0.00288184	0	0.00288184		0.00101494	1	0		0.00288184	0	0.00288184		0.00101494	1	1		0.00288184	0.00288184	0		0.00101494	1	1		0.00288184	0.00144718	0.00143467		0.00101494	1	2		0.00288184	0.00947867	0.00659683
0.00107183	0	0		0	0	0		0.00107183	0	2		0	0.00470588	0.00470588		0.00107183	0	0		0	0	0		0.00107183	0	4		0	0.00578871	0.00578871		0.00107183	0	1		0	0.00473934	0.00473934
0.00112871	0	0		0	0	0		0.00112871	0	0		0	0	0		0.00112871	0	0		0	0	0		0.00112871	0	1		0	0.00144718	0.00144718		0.00112871	0	0		0	0	0
0.0011856	2	0		0.00576369	0	0.00576369		0.0011856	2	0		0.00576369	0	0.00576369		0.0011856	2	2		0.00576369	0.00576369	0		0.0011856	2	1		0.00576369	0.00144718	0.00431651		0.0011856	2	6		0.00576369	0.028436	0.0226723
0.00124249	0	5		0	0.0150602	0.0150602		0.00124249	0	0		0	0	0		0.00124249	0	0		0	0	0		0.00124249	0	0		0	0	0		0.00124249	0	0		0	0	0
0.00129937	1	0		0.00288184	0	0.00288184		0.00129937	1	0		0.00288184	0	0.00288184		0.00129937	1	1		0.00288184	0.00288184	0		0.00129937	1	1		0.00288184	0.00144718	0.00143467		0.00129937	1	0		0.00288184	0	0.00288184
0.00135626	0	0		0	0	0		0.00135626	0	0		0	0	0		0.00135626	0	0		0	0	0		0.00135626	0	1		0	0.00144718	0.00144718		0.00135626	0	0		0	0	0
0.00141315	2	2		0.00576369	0.0060241	0.000260408		0.00141315	2	0		0.00576369	0	0.00576369		0.00141315	2	2		0.00576369	0.00576369	0		0.00141315	2	0		0.00576369	0	0.00576369		0.00141315	2	4		0.00576369	0.0189573	0.0131937
0.00147003	0	0		0	0	0		0.00147003	0	0		0	0	0		0.00147003	0	0		0	0	0		0.00147003	0	0		0	0	0		0.00147003	0	0		0	0	0
0.00152692	0	0		0	0	0		0.00152692	0	0		0	0	0		0.00152692	0	0		0	0	0		0.00152692	0	0		0	0	0		0.00152692	0	0		0	0	0
0.00158381	0	0		0	0	0		0.00158381	0	0		0	0	0		0.00158381	0	0		0	0	0		0.00158381	0	0		0	0	0		0.00158381	0	0		0	0	0
0.00164069	0	1		0	0.00301205	0.00301205		0.00164069	0	0		0	0	0		0.00164069	0	0		0	0	0		0.00164069	0	0		0	0	0		0.00164069	0	0		0	0	0
0.00169758	3	0		0.00864553	0	0.00864553		0.00169758	3	0		0.00864553	0	0.00864553		0.00169758	3	3		0.00864553	0.00864553	0		0.00169758	3	0		0.00864553	0	0.00864553		0.00169758	3	0		0.00864553	0	0.00864553
0.00175447	0	0		0	0	0		0.00175447	0	0		0	0	0		0.00175447	0	0		0	0	0		0.00175447	0	0		0	0	0		0.00175447	0	0		0	0	0
0.00181135	0	0		0	0	0		0.00181135	0	0		0	0	0		0.00181135	0	0		0	0	0		0.00181135	0	0		0	0	0		0.00181135	0	0		0	0	0
0.00186824	0	0		0	0	0		0.00186824	0	0		0	0	0		0.00186824	0	0		0	0	0		0.00186824	0	0		0	0	0		0.00186824	0	0		0	0	0
0.00192513	0	0		0	0	0		0.00192513	0	0		0	0	0		0.00192513	0	0		0	0	0		0.00192513	0	0		0	0	0		0.00192513	0	0		0	0	0
0.00198201	0	0		0	0	0		0.00198201	0	0		0	0	0		0.00198201	0	0		0	0	0		0.00198201	0	0		0	0	0		0.00198201	0	0		0	0	0
0.0020389	0	0		0	0	0		0.0020389	0	0		0	0	0		0.0020389	0	0		0	0	0		0.0020389	0	0		0	0	0		0.0020389	0	0		0	0	0
0.00209579	0	0		0	0	0		0.00209579	0	0		0	0	0		0.00209579	0	0		0	0	0		0.00209579	0	0		0	0	0		0.00209579	0	0		0	0	0
0.00215267	0	0		0	0	0		0.00215267	0	0		0	0	0		0.00215267	0	0		0	0	0		0.00215267	0	0		0	0	0		0.00215267	0	0		0	0	0
0.00220956	0	0		0	0	0		0.00220956	0	0		0	0	0		0.00220956	0	0		0	0	0		0.00220956	0	0		0	0	0		0.00220956	0	0		0	0	0
0.00226645	0	0		0	0	0		0.00226645	0	0		0	0	0		0.00226645	0	0		0	0	0		0.00226645	0	0		0	0	0		0.00226645	0	0		0	0	0
0.00232333	0	0		0	0	0		0.00232333	0	0		0	0	0		0.00232333	0	0		0	0	0		0.00232333	0	0		0	0	0		0.00232333	0	0		0	0	0
0.00238022	0	0		0	0	0		0.00238022	0	0		0	0	0		0.00238022	0	0		0	0	0		0.00238022	0	0		0	0	0		0.00238022	0	0		0	0	0
0.00243711	0	0		0	0	0		0.00243711	0	0		0	0	0		0.00243711	0	0		0	0	0		0.00243711	0	0		0	0	0		0.00243711	0	0		0	0	0
0.00249399	0	0		0	0	0		0.00249399	0	0		0	0	0		0.00249399	0	0		0	0	0		0.00249399	0	0		0	0	0		0.00249399	0	0		0	0	0
0.00255088	0	0		0	0	0		0.00255088	0	0		0	0	0		0.00255088	0	0		0	0	0		0.00255088	0	0		0	0	0		0.00255088	0	0		0	0	0
0.00260777	0	0		0	0	0		0.00260777	0	0		0	0	0		0.00260777	0	0		0	0	0		0.00260777	0	0		0	0	0		0.00260777	0	0		0	0	0
0.00266465	0	0		0	0	0		0.00266465	0	0		0	0	0		0.00266465	0	0		0	0	0		0.00266465	0	0		0	0	0		0.00266465	0	0		0	0	0
0.00272154	0	0		0	0	0		0.00272154	0	0		0	0	0		0.00272154	0	0		0	0	0		0.00272154	0	0		0	0	0		0.00272154	0	0		0	0	0
0.00277843	0	0		0	0	0		0.00277843	0	0		0	0	0		0.00277843	0	0		0	0	0		0.00277843	0	0		0	0	0		0.00277843	0	0		0	0	0
0.00283531	0	0		0	0	0		0.00283531	0	0		0	0	0		0.00283531	0	0		0	0	0		0.00283531	0	1		0	0.00144718	0.00144718		0.00283531	0	0		0	0	0
Total:	347	332						Total:	347	425						Total:	347	347						Total:	347	691						Total:	347	211
					D-stat	0.0431148							D-stat	0.0870927							D-stat	0							D-stat	0.0429274							D-stat	0.0555199
					D-crit	0.103245							D-crit	0.0973595							D-crit	0.10211							D-crit	0.0886147							D-crit	0.117235
					Sig diff?	no							Sig diff?	no							Sig diff?	no							Sig diff?	no							Sig diff?	no

## Sheet: Rhondda
	Swansea								Hughes								Brithdir								Rhondda								Llynfi
Bin lower	Rhondda	Swansea		Cum%a	Cum%b	Diff		Bin lower	Rhondda	Hughes		Cum%a	Cum%b	Diff		Bin lower	Rhondda	Brithdir		Cum%a	Cum%b	Diff		Bin lower	Rhondda	Rhondda		Cum%a	Cum%b	Diff		Bin lower	Rhondda	Llynfi		Cum%a	Cum%b	Diff
4.78657e-05	0	1		0	0.00301205	0.00301205		4.78657e-05	0	0		0	0	0		4.78657e-05	0	1		0	0.00288184	0.00288184		4.78657e-05	0	0		0	0	0		4.78657e-05	0	0		0	0	0
0.000104752	1	0		0.00144718	0	0.00144718		0.000104752	1	2		0.00144718	0.00470588	0.0032587		0.000104752	1	3		0.00144718	0.00864553	0.00719836		0.000104752	1	1		0.00144718	0.00144718	0		0.000104752	1	1		0.00144718	0.00473934	0.00329216
0.000161639	9	2		0.0130246	0.0060241	0.00700051		0.000161639	9	1		0.0130246	0.00235294	0.0106717		0.000161639	9	11		0.0130246	0.0317003	0.0186757		0.000161639	9	9		0.0130246	0.0130246	0		0.000161639	9	2		0.0130246	0.00947867	0.00354593
0.000218526	35	17		0.0506512	0.0512048	0.000553589		0.000218526	35	11		0.0506512	0.0258824	0.0247689		0.000218526	35	25		0.0506512	0.0720461	0.0213949		0.000218526	35	35		0.0506512	0.0506512	0		0.000218526	35	5		0.0506512	0.0236967	0.0269545
0.000275412	76	45		0.109986	0.135542	0.0255566		0.000275412	76	23		0.109986	0.0541176	0.0558679		0.000275412	76	49		0.109986	0.14121	0.0312248		0.000275412	76	76		0.109986	0.109986	0		0.000275412	76	26		0.109986	0.123223	0.0132372
0.000332299	100	49		0.144718	0.14759	0.00287256		0.000332299	100	52		0.144718	0.122353	0.0223649		0.000332299	100	49		0.144718	0.14121	0.00350743		0.000332299	100	100		0.144718	0.144718	0		0.000332299	100	27		0.144718	0.127962	0.0167557
0.000389186	111	47		0.160637	0.141566	0.0190705		0.000389186	111	67		0.160637	0.157647	0.0029897		0.000389186	111	42		0.160637	0.121037	0.0395993		0.000389186	111	111		0.160637	0.160637	0		0.000389186	111	26		0.160637	0.123223	0.037414
0.000446072	114	48		0.164978	0.144578	0.0204		0.000446072	114	68		0.164978	0.16	0.00497829		0.000446072	114	43		0.164978	0.123919	0.041059		0.000446072	114	114		0.164978	0.164978	0		0.000446072	114	37		0.164978	0.175355	0.0103772
0.000502959	77	29		0.111433	0.0873494	0.0240833		0.000502959	77	60		0.111433	0.141176	0.0297438		0.000502959	77	30		0.111433	0.0864553	0.0249774		0.000502959	77	77		0.111433	0.111433	0		0.000502959	77	24		0.111433	0.113744	0.00231137
0.000559846	48	23		0.0694645	0.0692771	0.000187436		0.000559846	48	33		0.0694645	0.0776471	0.00818251		0.000559846	48	39		0.0694645	0.112392	0.0429274		0.000559846	48	48		0.0694645	0.0694645	0		0.000559846	48	12		0.0694645	0.056872	0.0125925
0.000616732	43	24		0.0622287	0.0722892	0.0100605		0.000616732	43	40		0.0622287	0.0941176	0.031889		0.000616732	43	16		0.0622287	0.0461095	0.0161191		0.000616732	43	43		0.0622287	0.0622287	0		0.000616732	43	14		0.0622287	0.0663507	0.00412206
0.000673619	26	14		0.0376266	0.0421687	0.00454205		0.000673619	26	23		0.0376266	0.0541176	0.016491		0.000673619	26	4		0.0376266	0.0115274	0.0260993		0.000673619	26	26		0.0376266	0.0376266	0		0.000673619	26	4		0.0376266	0.0189573	0.0186693
0.000730506	16	9		0.0231548	0.0271084	0.00395359		0.000730506	16	24		0.0231548	0.0564706	0.0333157		0.000730506	16	10		0.0231548	0.0288184	0.0056636		0.000730506	16	16		0.0231548	0.0231548	0		0.000730506	16	10		0.0231548	0.0473934	0.0242385
0.000787392	9	7		0.0130246	0.0210843	0.00805974		0.000787392	9	9		0.0130246	0.0211765	0.00815187		0.000787392	9	13		0.0130246	0.037464	0.0244394		0.000787392	9	9		0.0130246	0.0130246	0		0.000787392	9	5		0.0130246	0.0236967	0.0106721
0.000844279	8	5		0.0115774	0.0150602	0.00348282		0.000844279	8	0		0.0115774	0	0.0115774		0.000844279	8	0		0.0115774	0	0.0115774		0.000844279	8	8		0.0115774	0.0115774	0		0.000844279	8	1		0.0115774	0.00473934	0.00683809
0.000901166	2	1		0.00289436	0.00301205	0.000117692		0.000901166	2	5		0.00289436	0.0117647	0.00887035		0.000901166	2	3		0.00289436	0.00864553	0.00575118		0.000901166	2	2		0.00289436	0.00289436	0		0.000901166	2	4		0.00289436	0.0189573	0.016063
0.000958052	6	3		0.00868307	0.00903614	0.000353077		0.000958052	6	5		0.00868307	0.0117647	0.00308164		0.000958052	6	0		0.00868307	0	0.00868307		0.000958052	6	6		0.00868307	0.00868307	0		0.000958052	6	0		0.00868307	0	0.00868307
0.00101494	1	0		0.00144718	0	0.00144718		0.00101494	1	0		0.00144718	0	0.00144718		0.00101494	1	1		0.00144718	0.00288184	0.00143467		0.00101494	1	1		0.00144718	0.00144718	0		0.00101494	1	2		0.00144718	0.00947867	0.00803149
0.00107183	4	0		0.00578871	0	0.00578871		0.00107183	4	2		0.00578871	0.00470588	0.00108283		0.00107183	4	0		0.00578871	0	0.00578871		0.00107183	4	4		0.00578871	0.00578871	0		0.00107183	4	1		0.00578871	0.00473934	0.00104938
0.00112871	1	0		0.00144718	0	0.00144718		0.00112871	1	0		0.00144718	0	0.00144718		0.00112871	1	0		0.00144718	0	0.00144718		0.00112871	1	1		0.00144718	0.00144718	0		0.00112871	1	0		0.00144718	0	0.00144718
0.0011856	1	0		0.00144718	0	0.00144718		0.0011856	1	0		0.00144718	0	0.00144718		0.0011856	1	2		0.00144718	0.00576369	0.00431651		0.0011856	1	1		0.00144718	0.00144718	0		0.0011856	1	6		0.00144718	0.028436	0.0269888
0.00124249	0	5		0	0.0150602	0.0150602		0.00124249	0	0		0	0	0		0.00124249	0	0		0	0	0		0.00124249	0	0		0	0	0		0.00124249	0	0		0	0	0
0.00129937	1	0		0.00144718	0	0.00144718		0.00129937	1	0		0.00144718	0	0.00144718		0.00129937	1	1		0.00144718	0.00288184	0.00143467		0.00129937	1	1		0.00144718	0.00144718	0		0.00129937	1	0		0.00144718	0	0.00144718
0.00135626	1	0		0.00144718	0	0.00144718		0.00135626	1	0		0.00144718	0	0.00144718		0.00135626	1	0		0.00144718	0	0.00144718		0.00135626	1	1		0.00144718	0.00144718	0		0.00135626	1	0		0.00144718	0	0.00144718
0.00141315	0	2		0	0.0060241	0.0060241		0.00141315	0	0		0	0	0		0.00141315	0	2		0	0.00576369	0.00576369		0.00141315	0	0		0	0	0		0.00141315	0	4		0	0.0189573	0.0189573
0.00147003	0	0		0	0	0		0.00147003	0	0		0	0	0		0.00147003	0	0		0	0	0		0.00147003	0	0		0	0	0		0.00147003	0	0		0	0	0
0.00152692	0	0		0	0	0		0.00152692	0	0		0	0	0		0.00152692	0	0		0	0	0		0.00152692	0	0		0	0	0		0.00152692	0	0		0	0	0
0.00158381	0	0		0	0	0		0.00158381	0	0		0	0	0		0.00158381	0	0		0	0	0		0.00158381	0	0		0	0	0		0.00158381	0	0		0	0	0
0.00164069	0	1		0	0.00301205	0.00301205		0.00164069	0	0		0	0	0		0.00164069	0	0		0	0	0		0.00164069	0	0		0	0	0		0.00164069	0	0		0	0	0
0.00169758	0	0		0	0	0		0.00169758	0	0		0	0	0		0.00169758	0	3		0	0.00864553	0.00864553		0.00169758	0	0		0	0	0		0.00169758	0	0		0	0	0
0.00175447	0	0		0	0	0		0.00175447	0	0		0	0	0		0.00175447	0	0		0	0	0		0.00175447	0	0		0	0	0		0.00175447	0	0		0	0	0
0.00181135	0	0		0	0	0		0.00181135	0	0		0	0	0		0.00181135	0	0		0	0	0		0.00181135	0	0		0	0	0		0.00181135	0	0		0	0	0
0.00186824	0	0		0	0	0		0.00186824	0	0		0	0	0		0.00186824	0	0		0	0	0		0.00186824	0	0		0	0	0		0.00186824	0	0		0	0	0
0.00192513	0	0		0	0	0		0.00192513	0	0		0	0	0		0.00192513	0	0		0	0	0		0.00192513	0	0		0	0	0		0.00192513	0	0		0	0	0
0.00198201	0	0		0	0	0		0.00198201	0	0		0	0	0		0.00198201	0	0		0	0	0		0.00198201	0	0		0	0	0		0.00198201	0	0		0	0	0
0.0020389	0	0		0	0	0		0.0020389	0	0		0	0	0		0.0020389	0	0		0	0	0		0.0020389	0	0		0	0	0		0.0020389	0	0		0	0	0
0.00209579	0	0		0	0	0		0.00209579	0	0		0	0	0		0.00209579	0	0		0	0	0		0.00209579	0	0		0	0	0		0.00209579	0	0		0	0	0
0.00215267	0	0		0	0	0		0.00215267	0	0		0	0	0		0.00215267	0	0		0	0	0		0.00215267	0	0		0	0	0		0.00215267	0	0		0	0	0
0.00220956	0	0		0	0	0		0.00220956	0	0		0	0	0		0.00220956	0	0		0	0	0		0.00220956	0	0		0	0	0		0.00220956	0	0		0	0	0
0.00226645	0	0		0	0	0		0.00226645	0	0		0	0	0		0.00226645	0	0		0	0	0		0.00226645	0	0		0	0	0		0.00226645	0	0		0	0	0
0.00232333	0	0		0	0	0		0.00232333	0	0		0	0	0		0.00232333	0	0		0	0	0		0.00232333	0	0		0	0	0		0.00232333	0	0		0	0	0
0.00238022	0	0		0	0	0		0.00238022	0	0		0	0	0		0.00238022	0	0		0	0	0		0.00238022	0	0		0	0	0		0.00238022	0	0		0	0	0
0.00243711	0	0		0	0	0		0.00243711	0	0		0	0	0		0.00243711	0	0		0	0	0		0.00243711	0	0		0	0	0		0.00243711	0	0		0	0	0
0.00249399	0	0		0	0	0		0.00249399	0	0		0	0	0		0.00249399	0	0		0	0	0		0.00249399	0	0		0	0	0		0.00249399	0	0		0	0	0
0.00255088	0	0		0	0	0		0.00255088	0	0		0	0	0		0.00255088	0	0		0	0	0		0.00255088	0	0		0	0	0		0.00255088	0	0		0	0	0
0.00260777	0	0		0	0	0		0.00260777	0	0		0	0	0		0.00260777	0	0		0	0	0		0.00260777	0	0		0	0	0		0.00260777	0	0		0	0	0
0.00266465	0	0		0	0	0		0.00266465	0	0		0	0	0		0.00266465	0	0		0	0	0		0.00266465	0	0		0	0	0		0.00266465	0	0		0	0	0
0.00272154	0	0		0	0	0		0.00272154	0	0		0	0	0		0.00272154	0	0		0	0	0		0.00272154	0	0		0	0	0		0.00272154	0	0		0	0	0
0.00277843	0	0		0	0	0		0.00277843	0	0		0	0	0		0.00277843	0	0		0	0	0		0.00277843	0	0		0	0	0		0.00277843	0	0		0	0	0
0.00283531	1	0		0.00144718	0	0.00144718		0.00283531	1	0		0.00144718	0	0.00144718		0.00283531	1	0		0.00144718	0	0.00144718		0.00283531	1	1		0.00144718	0.00144718	0		0.00283531	1	0		0.00144718	0	0.00144718
Total:	691	332						Total:	691	425						Total:	691	347						Total:	691	691						Total:	691	211
					D-stat	0.0255566							D-stat	0.0558679							D-stat	0.0429274							D-stat	0							D-stat	0.037414
					D-crit	0.0899256							D-crit	0.0830709							D-crit	0.0886147							D-crit	0.072573							D-crit	0.10575
					Sig diff?	no							Sig diff?	no							Sig diff?	no							Sig diff?	no							Sig diff?	no

## Sheet: Llynfi
	Swansea								Hughes								Brithdir								Rhondda								Llynfi
Bin lower	Llynfi	Swansea		Cum%a	Cum%b	Diff		Bin lower	Llynfi	Hughes		Cum%a	Cum%b	Diff		Bin lower	Llynfi	Brithdir		Cum%a	Cum%b	Diff		Bin lower	Llynfi	Rhondda		Cum%a	Cum%b	Diff		Bin lower	Llynfi	Llynfi		Cum%a	Cum%b	Diff
4.78657e-05	0	1		0	0.00301205	0.00301205		4.78657e-05	0	0		0	0	0		4.78657e-05	0	1		0	0.00288184	0.00288184		4.78657e-05	0	0		0	0	0		4.78657e-05	0	0		0	0	0
0.000104752	1	0		0.00473934	0	0.00473934		0.000104752	1	2		0.00473934	0.00470588	3.34541e-05		0.000104752	1	3		0.00473934	0.00864553	0.0039062		0.000104752	1	1		0.00473934	0.00144718	0.00329216		0.000104752	1	1		0.00473934	0.00473934	0
0.000161639	2	2		0.00947867	0.0060241	0.00345458		0.000161639	2	1		0.00947867	0.00235294	0.00712573		0.000161639	2	11		0.00947867	0.0317003	0.0222216		0.000161639	2	9		0.00947867	0.0130246	0.00354593		0.000161639	2	2		0.00947867	0.00947867	0
0.000218526	5	17		0.0236967	0.0512048	0.0275081		0.000218526	5	11		0.0236967	0.0258824	0.00218567		0.000218526	5	25		0.0236967	0.0720461	0.0483494		0.000218526	5	35		0.0236967	0.0506512	0.0269545		0.000218526	5	5		0.0236967	0.0236967	0
0.000275412	26	45		0.123223	0.135542	0.0123194		0.000275412	26	23		0.123223	0.0541176	0.0691051		0.000275412	26	49		0.123223	0.14121	0.0179876		0.000275412	26	76		0.123223	0.109986	0.0132372		0.000275412	26	26		0.123223	0.123223	0
0.000332299	27	49		0.127962	0.14759	0.0196283		0.000332299	27	52		0.127962	0.122353	0.00560914		0.000332299	27	49		0.127962	0.14121	0.0132483		0.000332299	27	100		0.127962	0.144718	0.0167557		0.000332299	27	27		0.127962	0.127962	0
0.000389186	26	47		0.123223	0.141566	0.0183435		0.000389186	26	67		0.123223	0.157647	0.0344243		0.000389186	26	42		0.123223	0.121037	0.00218528		0.000389186	26	111		0.123223	0.160637	0.037414		0.000389186	26	26		0.123223	0.123223	0
0.000446072	37	48		0.175355	0.144578	0.0307771		0.000446072	37	68		0.175355	0.16	0.0153555		0.000446072	37	43		0.175355	0.123919	0.0514361		0.000446072	37	114		0.175355	0.164978	0.0103772		0.000446072	37	37		0.175355	0.175355	0
0.000502959	24	29		0.113744	0.0873494	0.0263947		0.000502959	24	60		0.113744	0.141176	0.0274324		0.000502959	24	30		0.113744	0.0864553	0.0272887		0.000502959	24	77		0.113744	0.111433	0.00231137		0.000502959	24	24		0.113744	0.113744	0
0.000559846	12	23		0.056872	0.0692771	0.0124051		0.000559846	12	33		0.056872	0.0776471	0.020775		0.000559846	12	39		0.056872	0.112392	0.0555199		0.000559846	12	48		0.056872	0.0694645	0.0125925		0.000559846	12	12		0.056872	0.056872	0
0.000616732	14	24		0.0663507	0.0722892	0.00593845		0.000616732	14	40		0.0663507	0.0941176	0.0277669		0.000616732	14	16		0.0663507	0.0461095	0.0202412		0.000616732	14	43		0.0663507	0.0622287	0.00412206		0.000616732	14	14		0.0663507	0.0663507	0
0.000673619	4	14		0.0189573	0.0421687	0.0232113		0.000673619	4	23		0.0189573	0.0541176	0.0351603		0.000673619	4	4		0.0189573	0.0115274	0.00742997		0.000673619	4	26		0.0189573	0.0376266	0.0186693		0.000673619	4	4		0.0189573	0.0189573	0
0.000730506	10	9		0.0473934	0.0271084	0.0202849		0.000730506	10	24		0.0473934	0.0564706	0.00907722		0.000730506	10	10		0.0473934	0.0288184	0.0185749		0.000730506	10	16		0.0473934	0.0231548	0.0242385		0.000730506	10	10		0.0473934	0.0473934	0
0.000787392	5	7		0.0236967	0.0210843	0.00261235		0.000787392	5	9		0.0236967	0.0211765	0.00252021		0.000787392	5	13		0.0236967	0.037464	0.0137673		0.000787392	5	9		0.0236967	0.0130246	0.0106721		0.000787392	5	5		0.0236967	0.0236967	0
0.000844279	1	5		0.00473934	0.0150602	0.0103209		0.000844279	1	0		0.00473934	0	0.00473934		0.000844279	1	0		0.00473934	0	0.00473934		0.000844279	1	8		0.00473934	0.0115774	0.00683809		0.000844279	1	1		0.00473934	0.00473934	0
0.000901166	4	1		0.0189573	0.00301205	0.0159453		0.000901166	4	5		0.0189573	0.0117647	0.00719264		0.000901166	4	3		0.0189573	0.00864553	0.0103118		0.000901166	4	2		0.0189573	0.00289436	0.016063		0.000901166	4	4		0.0189573	0.0189573	0
0.000958052	0	3		0	0.00903614	0.00903614		0.000958052	0	5		0	0.0117647	0.0117647		0.000958052	0	0		0	0	0		0.000958052	0	6		0	0.00868307	0.00868307		0.000958052	0	0		0	0	0
0.00101494	2	0		0.00947867	0	0.00947867		0.00101494	2	0		0.00947867	0	0.00947867		0.00101494	2	1		0.00947867	0.00288184	0.00659683		0.00101494	2	1		0.00947867	0.00144718	0.00803149		0.00101494	2	2		0.00947867	0.00947867	0
0.00107183	1	0		0.00473934	0	0.00473934		0.00107183	1	2		0.00473934	0.00470588	3.34541e-05		0.00107183	1	0		0.00473934	0	0.00473934		0.00107183	1	4		0.00473934	0.00578871	0.00104938		0.00107183	1	1		0.00473934	0.00473934	0
0.00112871	0	0		0	0	0		0.00112871	0	0		0	0	0		0.00112871	0	0		0	0	0		0.00112871	0	1		0	0.00144718	0.00144718		0.00112871	0	0		0	0	0
0.0011856	6	0		0.028436	0	0.028436		0.0011856	6	0		0.028436	0	0.028436		0.0011856	6	2		0.028436	0.00576369	0.0226723		0.0011856	6	1		0.028436	0.00144718	0.0269888		0.0011856	6	6		0.028436	0.028436	0
0.00124249	0	5		0	0.0150602	0.0150602		0.00124249	0	0		0	0	0		0.00124249	0	0		0	0	0		0.00124249	0	0		0	0	0		0.00124249	0	0		0	0	0
0.00129937	0	0		0	0	0		0.00129937	0	0		0	0	0		0.00129937	0	1		0	0.00288184	0.00288184		0.00129937	0	1		0	0.00144718	0.00144718		0.00129937	0	0		0	0	0
0.00135626	0	0		0	0	0		0.00135626	0	0		0	0	0		0.00135626	0	0		0	0	0		0.00135626	0	1		0	0.00144718	0.00144718		0.00135626	0	0		0	0	0
0.00141315	4	2		0.0189573	0.0060241	0.0129332		0.00141315	4	0		0.0189573	0	0.0189573		0.00141315	4	2		0.0189573	0.00576369	0.0131937		0.00141315	4	0		0.0189573	0	0.0189573		0.00141315	4	4		0.0189573	0.0189573	0
0.00147003	0	0		0	0	0		0.00147003	0	0		0	0	0		0.00147003	0	0		0	0	0		0.00147003	0	0		0	0	0		0.00147003	0	0		0	0	0
0.00152692	0	0		0	0	0		0.00152692	0	0		0	0	0		0.00152692	0	0		0	0	0		0.00152692	0	0		0	0	0		0.00152692	0	0		0	0	0
0.00158381	0	0		0	0	0		0.00158381	0	0		0	0	0		0.00158381	0	0		0	0	0		0.00158381	0	0		0	0	0		0.00158381	0	0		0	0	0
0.00164069	0	1		0	0.00301205	0.00301205		0.00164069	0	0		0	0	0		0.00164069	0	0		0	0	0		0.00164069	0	0		0	0	0		0.00164069	0	0		0	0	0
0.00169758	0	0		0	0	0		0.00169758	0	0		0	0	0		0.00169758	0	3		0	0.00864553	0.00864553		0.00169758	0	0		0	0	0		0.00169758	0	0		0	0	0
0.00175447	0	0		0	0	0		0.00175447	0	0		0	0	0		0.00175447	0	0		0	0	0		0.00175447	0	0		0	0	0		0.00175447	0	0		0	0	0
0.00181135	0	0		0	0	0		0.00181135	0	0		0	0	0		0.00181135	0	0		0	0	0		0.00181135	0	0		0	0	0		0.00181135	0	0		0	0	0
0.00186824	0	0		0	0	0		0.00186824	0	0		0	0	0		0.00186824	0	0		0	0	0		0.00186824	0	0		0	0	0		0.00186824	0	0		0	0	0
0.00192513	0	0		0	0	0		0.00192513	0	0		0	0	0		0.00192513	0	0		0	0	0		0.00192513	0	0		0	0	0		0.00192513	0	0		0	0	0
0.00198201	0	0		0	0	0		0.00198201	0	0		0	0	0		0.00198201	0	0		0	0	0		0.00198201	0	0		0	0	0		0.00198201	0	0		0	0	0
0.0020389	0	0		0	0	0		0.0020389	0	0		0	0	0		0.0020389	0	0		0	0	0		0.0020389	0	0		0	0	0		0.0020389	0	0		0	0	0
0.00209579	0	0		0	0	0		0.00209579	0	0		0	0	0		0.00209579	0	0		0	0	0		0.00209579	0	0		0	0	0		0.00209579	0	0		0	0	0
0.00215267	0	0		0	0	0		0.00215267	0	0		0	0	0		0.00215267	0	0		0	0	0		0.00215267	0	0		0	0	0		0.00215267	0	0		0	0	0
0.00220956	0	0		0	0	0		0.00220956	0	0		0	0	0		0.00220956	0	0		0	0	0		0.00220956	0	0		0	0	0		0.00220956	0	0		0	0	0
0.00226645	0	0		0	0	0		0.00226645	0	0		0	0	0		0.00226645	0	0		0	0	0		0.00226645	0	0		0	0	0		0.00226645	0	0		0	0	0
0.00232333	0	0		0	0	0		0.00232333	0	0		0	0	0		0.00232333	0	0		0	0	0		0.00232333	0	0		0	0	0		0.00232333	0	0		0	0	0
0.00238022	0	0		0	0	0		0.00238022	0	0		0	0	0		0.00238022	0	0		0	0	0		0.00238022	0	0		0	0	0		0.00238022	0	0		0	0	0
0.00243711	0	0		0	0	0		0.00243711	0	0		0	0	0		0.00243711	0	0		0	0	0		0.00243711	0	0		0	0	0		0.00243711	0	0		0	0	0
0.00249399	0	0		0	0	0		0.00249399	0	0		0	0	0		0.00249399	0	0		0	0	0		0.00249399	0	0		0	0	0		0.00249399	0	0		0	0	0
0.00255088	0	0		0	0	0		0.00255088	0	0		0	0	0		0.00255088	0	0		0	0	0		0.00255088	0	0		0	0	0		0.00255088	0	0		0	0	0
0.00260777	0	0		0	0	0		0.00260777	0	0		0	0	0		0.00260777	0	0		0	0	0		0.00260777	0	0		0	0	0		0.00260777	0	0		0	0	0
0.00266465	0	0		0	0	0		0.00266465	0	0		0	0	0		0.00266465	0	0		0	0	0		0.00266465	0	0		0	0	0		0.00266465	0	0		0	0	0
0.00272154	0	0		0	0	0		0.00272154	0	0		0	0	0		0.00272154	0	0		0	0	0		0.00272154	0	0		0	0	0		0.00272154	0	0		0	0	0
0.00277843	0	0		0	0	0		0.00277843	0	0		0	0	0		0.00277843	0	0		0	0	0		0.00277843	0	0		0	0	0		0.00277843	0	0		0	0	0
0.00283531	0	0		0	0	0		0.00283531	0	0		0	0	0		0.00283531	0	0		0	0	0		0.00283531	0	1		0	0.00144718	0.00144718		0.00283531	0	0		0	0	0
Total:	211	332						Total:	211	425						Total:	211	347						Total:	211	691						Total:	211	211
					D-stat	0.0307771							D-stat	0.0691051							D-stat	0.0555199							D-stat	0.037414							D-stat	0
					D-crit	0.11822							D-crit	0.113142							D-crit	0.117235							D-crit	0.10575							D-crit	0.130561
					Sig diff?	no							Sig diff?	no							Sig diff?	no							Sig diff?	no							Sig diff?	no

## Sheet: Brithdir Loc Tests
Dist Values			Max	0.001744		Binned	50 bins							0.00169614		Tests
loc 5.2	Loc 5.3	Loc 6.2	Min	4.78657e-05		Bin num	Bin lower	loc 5.2	Loc 5.3	Loc 6.2			each bin size is:	3.39227e-05			Bin lower	Loc 5.2	Loc 5.3		Cum%a	Cum%b	Diff		Bin lower	Loc 5.2	Loc 6.2		Cum%a	Cum%b	Diff
0.000466833	0.000526477	0.000334361				1	4.78657e-05	0	0	1							4.78657e-05	0	0		0	0	0		4.78657e-05	0	1		0	0.00740741	0.00740741
0.000467863	0.000526385	0.000334419				2	8.17884e-05	0	0	0							8.17884e-05	0	0		0	0	0		8.17884e-05	0	0		0	0	0
0.000467343	0.000526137	0.000334319				3	0.000115711	0	0	1							0.000115711	0	0		0	0	0		0.000115711	0	1		0	0.00740741	0.00740741
0.000467085	0.000526418	0.000334482				4	0.000149634	0	0	2							0.000149634	0	0		0	0	0		0.000149634	0	2		0	0.0148148	0.0148148
0.000467669	0.000526182	0.000334646				5	0.000183557	1	0	7							0.000183557	1	0		0.00952381	0	0.00952381		0.000183557	1	7		0.00952381	0.0518519	0.042328
0.000467676	0.000526732	0.000334162				6	0.000217479	0	0	12							0.000217479	0	0		0	0	0		0.000217479	0	12		0	0.0888889	0.0888889
0.000443612	0.000526448	0.000328897				7	0.000251402	0	0	18							0.000251402	0	0		0	0	0		0.000251402	0	18		0	0.133333	0.133333
0.000443618	0.000526306	0.000320529				8	0.000285325	2	12	25							0.000285325	2	12		0.0190476	0.11215	0.0931019		0.000285325	2	25		0.0190476	0.185185	0.166138
0.000443556	0.00052653	0.000320007				9	0.000319247	3	6	20							0.000319247	3	6		0.0285714	0.0560748	0.0275033		0.000319247	3	20		0.0285714	0.148148	0.119577
0.000443836	0.000525825	0.00032043				10	0.00035317	4	13	11							0.00035317	4	13		0.0380952	0.121495	0.0834001		0.00035317	4	11		0.0380952	0.0814815	0.0433862
0.000421951	0.00052658	0.000320598				11	0.000387093	4	9	3							0.000387093	4	9		0.0380952	0.0841121	0.0460169		0.000387093	4	3		0.0380952	0.0222222	0.015873
0.000421386	0.000525966	0.000307478				12	0.000421015	8	14	5							0.000421015	8	14		0.0761905	0.130841	0.0546506		0.000421015	8	5		0.0761905	0.037037	0.0391534
0.000421721	0.000526585	0.000307246				13	0.000454938	6	19	5							0.000454938	6	19		0.0571429	0.17757	0.120427		0.000454938	6	5		0.0571429	0.037037	0.0201058
0.000421434	0.000526354	0.000307423				14	0.000488861	0	15	3							0.000488861	0	15		0	0.140187	0.140187		0.000488861	0	3		0	0.0222222	0.0222222
0.000401795	0.000526156	0.000307484				15	0.000522784	1	19	4							0.000522784	1	19		0.00952381	0.17757	0.168046		0.000522784	1	4		0.00952381	0.0296296	0.0201058
0.000401711	0.000526276	0.000306764				16	0.000556706	21	0	5							0.000556706	21	0		0.2	0	0.2		0.000556706	21	5		0.2	0.037037	0.162963
0.00040173	0.000525834	0.000306737				17	0.000590629	13	0	0							0.000590629	13	0		0.12381	0	0.12381		0.000590629	13	0		0.12381	0	0.12381
0.000391678	0.000526321	0.000295395				18	0.000624552	0	0	6							0.000624552	0	0		0	0	0		0.000624552	0	6		0	0.0444444	0.0444444
0.000383386	0.000526247	0.000295259				19	0.000658474	12	0	2							0.000658474	12	0		0.114286	0	0.114286		0.000658474	12	2		0.114286	0.0148148	0.0994709
0.000383268	0.000517921	0.000284328				20	0.000692397	0	0	0							0.000692397	0	0		0	0	0		0.000692397	0	0		0	0	0
0.000366795	0.000518219	0.000274181				21	0.00072632	8	0	2							0.00072632	8	0		0.0761905	0	0.0761905		0.00072632	8	2		0.0761905	0.0148148	0.0613757
0.000365652	0.000517742	0.000274038				22	0.000760243	0	0	0							0.000760243	0	0		0	0	0		0.000760243	0	0		0	0	0
0.000351354	0.000490693	0.000274366				23	0.000794165	11	0	2							0.000794165	11	0		0.104762	0	0.104762		0.000794165	11	2		0.104762	0.0148148	0.0899471
0.000337531	0.000490631	0.000274271				24	0.000828088	0	0	0							0.000828088	0	0		0	0	0		0.000828088	0	0		0	0	0
0.000337179	0.000490171	0.000274504				25	0.000862011	0	0	0							0.000862011	0	0		0	0	0		0.000862011	0	0		0	0	0
0.00030331	0.000490529	0.000274027				26	0.000895933	3	0	0							0.000895933	3	0		0.0285714	0	0.0285714		0.000895933	3	0		0.0285714	0	0.0285714
0.000303129	0.000490361	0.000273966				27	0.000929856	0	0	0							0.000929856	0	0		0	0	0		0.000929856	0	0		0	0	0
0.00174234	0.000490783	0.0002645				28	0.000963779	0	0	0							0.000963779	0	0		0	0	0		0.000963779	0	0		0	0	0
0.00174212	0.000490299	0.000247006				29	0.000997701	0	0	0							0.000997701	0	0		0	0	0		0.000997701	0	0		0	0	0
0.001744	0.000490649	0.00023934				30	0.00103162	1	0	0							0.00103162	1	0		0.00952381	0	0.00952381		0.00103162	1	0		0.00952381	0	0.00952381
0.00142817	0.000490647	0.0002248				31	0.00106555	0	0	0							0.00106555	0	0		0	0	0		0.00106555	0	0		0	0	0
0.00142736	0.000491006	0.000218296				32	0.00109947	0	0	0							0.00109947	0	0		0	0	0		0.00109947	0	0		0	0	0
0.00121001	0.000491171	0.000211971				33	0.00113339	0	0	0							0.00113339	0	0		0	0	0		0.00113339	0	0		0	0	0
0.00120797	0.000490759	0.000206308				34	0.00116732	0	0	0							0.00116732	0	0		0	0	0		0.00116732	0	0		0	0	0
0.00104391	0.000461601	0.00134019				35	0.00120124	2	0	0							0.00120124	2	0		0.0190476	0	0.0190476		0.00120124	2	0		0.0190476	0	0.0190476
0.000918586	0.000461624	0.000817696				36	0.00123516	0	0	0							0.00123516	0	0		0	0	0		0.00123516	0	0		0	0	0
0.000918451	0.000461845	0.000818357				37	0.00126908	0	0	0							0.00126908	0	0		0	0	0		0.00126908	0	0		0	0	0
0.00091883	0.000459423	0.000755547				38	0.00130301	0	0	0							0.00130301	0	0		0	0	0		0.00130301	0	0		0	0	0
0.000819312	0.000459035	0.00074347				39	0.00133693	0	0	1							0.00133693	0	0		0	0	0		0.00133693	0	1		0	0.00740741	0.00740741
0.000818477	0.000459367	0.000682052				40	0.00137085	0	0	0							0.00137085	0	0		0	0	0		0.00137085	0	0		0	0	0
0.000818774	0.00045942	0.000682038				41	0.00140477	2	0	0							0.00140477	2	0		0.0190476	0	0.0190476		0.00140477	2	0		0.0190476	0	0.0190476
0.00081948	0.000459386	0.000652142				42	0.0014387	0	0	0							0.0014387	0	0		0	0	0		0.0014387	0	0		0	0	0
0.000818308	0.000459123	0.000628636				43	0.00147262	0	0	0							0.00147262	0	0		0	0	0		0.00147262	0	0		0	0	0
0.000819298	0.000459026	0.000628915				44	0.00150654	0	0	0							0.00150654	0	0		0	0	0		0.00150654	0	0		0	0	0
0.000818947	0.00045956	0.000628456				45	0.00154046	0	0	0							0.00154046	0	0		0	0	0		0.00154046	0	0		0	0	0
0.000818287	0.000459399	0.000628703				46	0.00157439	0	0	0							0.00157439	0	0		0	0	0		0.00157439	0	0		0	0	0
0.000817869	0.000459119	0.000628601				47	0.00160831	0	0	0							0.00160831	0	0		0	0	0		0.00160831	0	0		0	0	0
0.000818653	0.000459598	0.000583241				48	0.00164223	0	0	0							0.00164223	0	0		0	0	0		0.00164223	0	0		0	0	0
0.000817988	0.000459859	0.000584026				49	0.00167616	0	0	0							0.00167616	0	0		0	0	0		0.00167616	0	0		0	0	0
0.000737948	0.000459447	0.000583952				50	0.00171008	3	0	0							0.00171008	3	0		0.0285714	0	0.0285714		0.00171008	3	0		0.0285714	0	0.0285714
0.000738228	0.00045896	0.000582886															Total:	105	107						Total:	105	135
0.000738267	0.000459503	0.000212021																				D-stat	0.2							D-stat	0.166138
0.000737397	0.000459415	0.000573982																				D-crit	0.165053							D-crit	0.156512
0.000737706	0.000431729	0.000544216																				Sig diff?	yes							Sig diff?	yes
0.000737816	0.000431785	0.000543396
0.000737075	0.000431894	0.000543642
0.000738164	0.000431442	0.000543466
0.000680805	0.000431835	0.000218334
0.000680137	0.000431759	0.000118106
0.000670926	0.000431742	0.000206058
0.00067075	0.000431733	0.000511477
0.000671154	0.000432133	0.000509095
0.000671507	0.000431693	0.000508793
0.000671148	0.000431015	0.000224792
0.000670393	0.000431822	0.000478845
0.000671358	0.000431565	0.000477956
0.000671299	0.0004321	0.000224465
0.000671168	0.000416554	0.00022504
0.000672342	0.000415912	0.000478591
0.000615603	0.000406997	0.000200567
0.000615375	0.000406899	0.000218231
0.000615574	0.000407016	0.000478759
0.000614264	0.000406675	0.000478632
0.000614997	0.000407417	0.000450731
0.000614985	0.000406799	0.000426481
0.000615652	0.000407143	0.000426994
0.000615026	0.000385162	0.000231761
0.000615364	0.000384353	0.000200571
0.000615482	0.000385047	0.000426591
0.000615528	0.000384898	0.000426158
0.000614851	0.000385093	0.000419507
0.000615523	0.000385397	0.000404703
0.000589091	0.000378736	0.000403943
0.00058908	0.000364867	0.000384813
0.000589308	0.000364931	0.000157228
0.000588891	0.000364854	0.00016082
0.000588654	0.000365284	0.000231799
0.000588674	0.000364823	0.000211859
0.00056707	0.000365336	0.000384366
0.000567492	0.000347109	0.000384521
0.000567649	0.000346807	0.000383548
0.000567062	0.000347052	0.000384461
0.000567826	0.00034691	0.000384742
0.000567854	0.000330829	0.000384295
0.000568209	0.000330321	0.000365961
0.000567302	0.000315219	0.000366615
0.000567599	0.000315869	0.00036615
0.000567923	0.000315389	0.000366242
0.00020928	0.000315271	0.000349395
0.000567373	0.000315847	0.000349809
0.000567115	0.000315508	0.00035018
0.000567153	0.000302184	0.000334332
0.000568055	0.000301529	0.000334489
0.000567588	0.000296754	0.000334177
0.000526912	0.000289291	0.000334665
	0.000289197	0.000334546
	0.000289152	0.000320832
		0.000307645
		0.000307428
		0.000307547
		0.000307441
		0.000307982
		0.000307232
		4.78657e-05
		0.000307669
		0.000306799
		0.000306654
		0.000306757
		0.00029582
		0.000295473
		0.000295685
		0.000295745
		0.00029502
		0.00029555
		0.000295785
		0.000284703
		0.000231797
		0.000274154
		0.000274014
		0.000274336
		0.000274093
		0.000264549
		0.000264772
		0.000264503
		0.000264336
